# Supplementary material for: Adapting Nonaka's SECI Model in Developing Knowledge Management System for UUM's Golf Club
Source: Royal Society of Chemistry journal article supplement (doi:10.1039/c9ra10775d), 2005-10-27
Supplement: c9ra10775d1.pdf [file c9ra10775d1.pdf]

Cite this: DOI: 10.1039/xxxxxxxxxx

## Supplementary: Electronic, Magnetic, Optical and Thermoelectric Properties of $\text{Ca}_2\text{Cr}_{1-x}\text{Ni}_x\text{OsO}_6$ Double Perovskites

Shalika R. Bhandari,<sup>a,b,c</sup> D. K. Yadav,<sup>c</sup> B. P. Belbase,<sup>a,c</sup> M. Zeeshan,<sup>d</sup> B. Sadhukhan,<sup>b</sup> D. P. Rai,<sup>e</sup> R. K. Thapa,<sup>c</sup> G. C. Kaphle,<sup>a,c</sup> and Madhav Prasad Ghimire<sup>a,b,c\*</sup>

Received Date

Accepted Date

DOI: 10.1039/xxxxxxxxxx

www.rsc.org/journalname

With the help of density functional theory calculations, we explored a recently synthesized double perovskite material  $\text{Ca}_2\text{CrOsO}_6$  and found it to be ferrimagnetic insulator with a band gap of  $\sim 0.6$  eV. The effective magnetic moment of it is found to be  $\sim 0.23 \mu_B/\text{unitcell}$ . The proposed behavior arises from the cooperative effect of spin-orbit coupling and Coulomb correlation of Cr-3d and Os-5d electrons along with the crystal field. Within the ferrimagnetic configuration, doping of 50% by Ni to the Cr-site resulted in the half-metallic state with compensation of total moments nearly to zero, a characteristic of spintronic materials. Meanwhile, the optical study reveals that both  $\epsilon_1^{xx}$  and  $\epsilon_1^{zz}$  decreases first and increases rapidly with increasing photon energy up to 1.055 eV. We also found the optical anisotropy up to  $\sim 14$  eV, which becomes almost optically isotropic. This material has a plateau like region in the  $\sigma_{xx}$  and  $\sigma_{zz}$  part of the optical conductivity due to a strong 3d-5d interband transition between Cr and Os. In addition, we performed the thermoelectric calculations whose results predicts that the material might not be good as a thermoelectric device due to small power factor.

<sup>a</sup> Central Department of Physics, Tribhuvan University, Kathmandu, Nepal

<sup>b</sup> Institute for Theoretical Solid State Physics, IFW Dresden e. V., Dresden-01069, Germany

<sup>c</sup> Condensed Matter Physics Research Center (CMPRC), Butwal, Rupandehi, Nepal

<sup>d</sup> Department of Chemistry, Indian Institute of Technology-Roorkee, Roorkee 247667, Uttarakhand, India

<sup>e</sup> Physical Sciences Research Center (PSRC), Department of Physics, Pachhunga University College, Aizawl, Mizoram, India

\* Corresponding author E-mail: mpghimire@tucdp.edu.np; ghimire.mpg@gmail.com

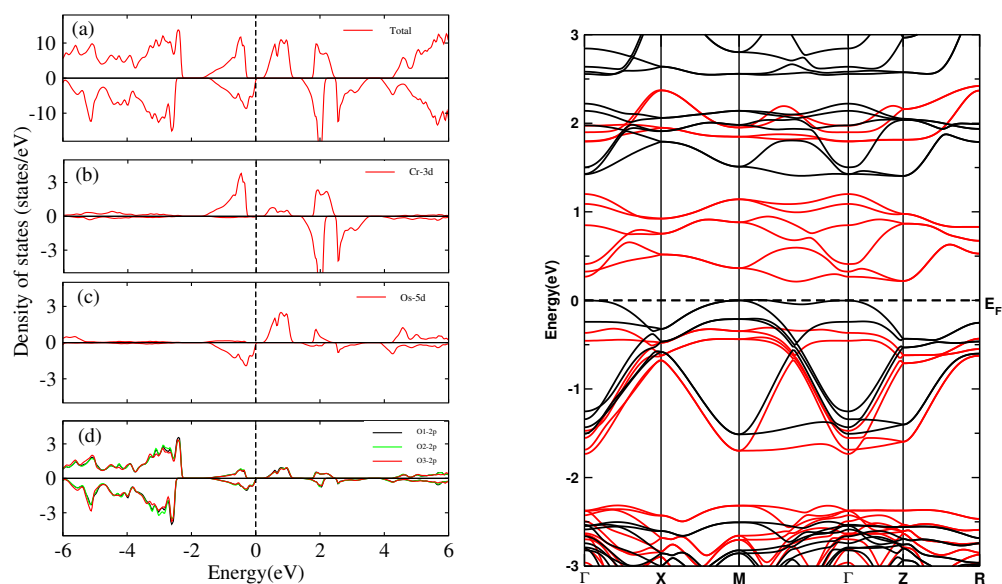

**Fig. S1** (Color online) DOS (top) and band structure (bottom) of  $\text{Ca}_2\text{CrOsO}_6$  with GGA functional. The vertical in (up) and horizontal in (down) dotted line indicates  $E_F=0$ .

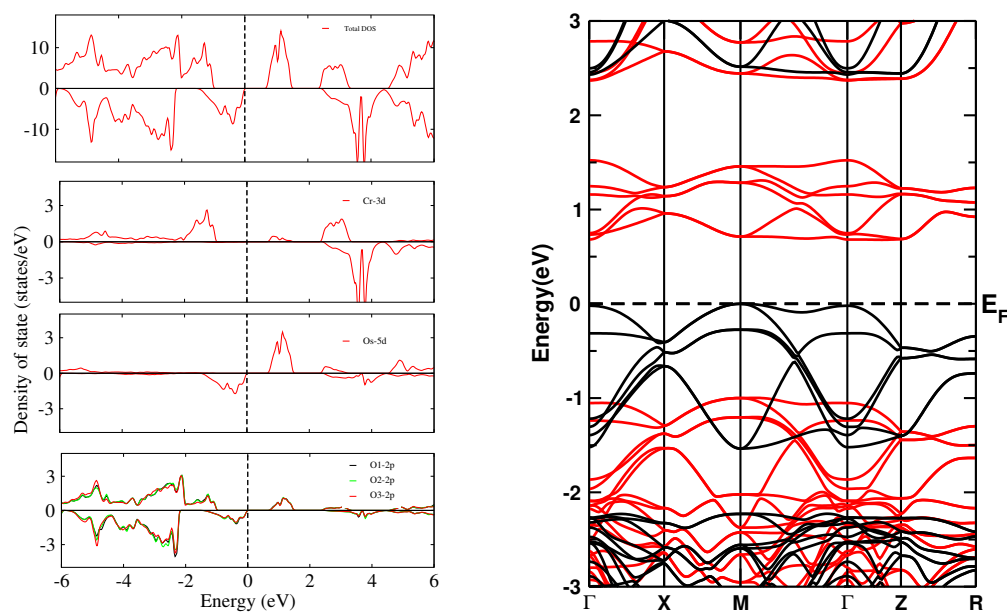

**Fig. S2** (Color online) DOS (left) and band structure (right) of  $\text{Ca}_2\text{CrOsO}_6$  with GGA+ $U$  functional. The vertical in (left) and horizontal in (right) dotted line indicates  $E_F=0$ .

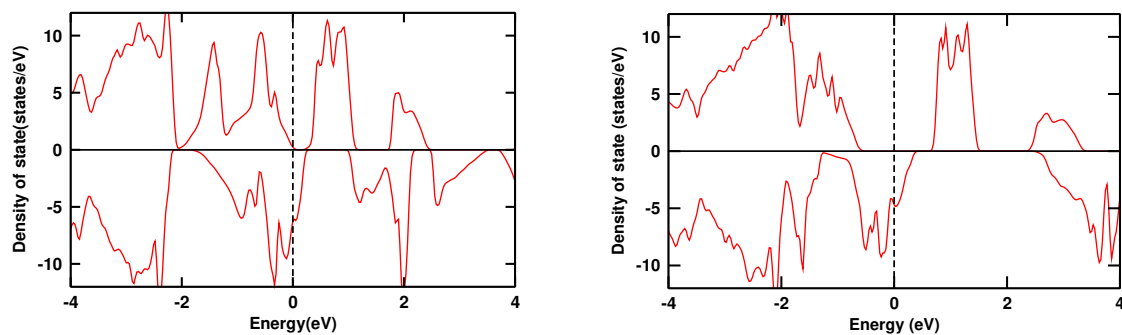

**Fig. S3** (Color online) Total DOS of  $\text{Ca}_2\text{Cr}_{0.5}\text{Ni}_{0.5}\text{OsO}_6$  with GGA (left) and GGA+U (right) functional. The vertical dotted line indicates  $E_F=0$ .

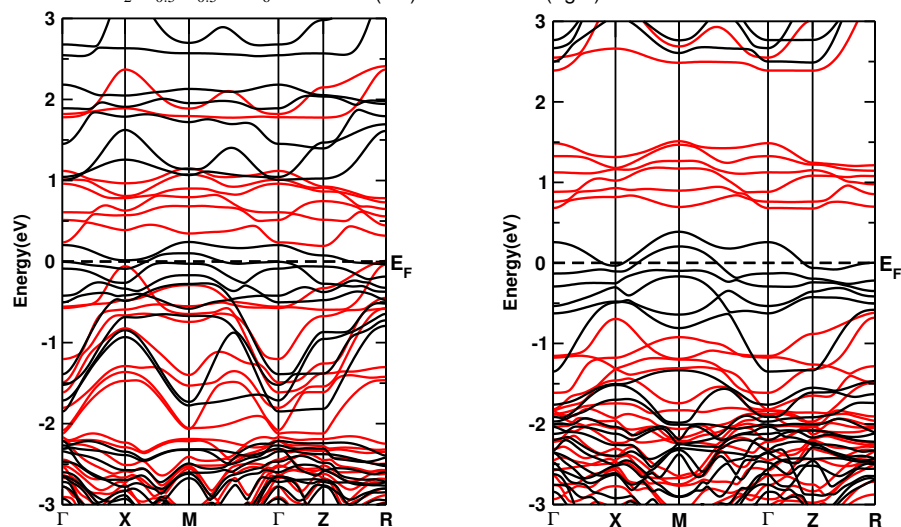

**Fig. S4** (Color online) Band structure of  $\text{Ca}_2\text{Cr}_{0.5}\text{Ni}_{0.5}\text{OsO}_6$  with GGA (left) and GGA+U (right) functional. The horizontal dotted line indicates  $E_F=0$ .
